# Supplementary material
Source: PubMed Central journal article supplement (PMC1568941)
Supplement: pnas_0603038103_2.pdf [file pnas_0603038103_2.pdf]

**Table 4. Comparison of putative fimbrial determinants of UPEC O6 strains 536 and CFT073**

| Determinant          | Main fimbrial subunit-encoding ORF designation ( <i>E. coli</i> 536) | ORF designation in <i>E. coli</i> CFT073 | Homology of putative main fimbrial subunit* | Presence in <i>E. coli</i> K-12* |
|----------------------|----------------------------------------------------------------------|------------------------------------------|---------------------------------------------|----------------------------------|
| Chaperone-usher like |                                                                      |                                          |                                             |                                  |
| Type 1               | ECP4649                                                              | c5393                                    | FimA (P04128)                               | FimA (P04128)                    |
| Type 1-like          | -                                                                    | c1936                                    | FimA (P04128)                               | -                                |
|                      | ECP3517                                                              | c4212                                    | FimA (P04128)                               | -                                |
| S fimbriae           | ECP0293 (SfaA(I))                                                    | c1239 (FocA)                             | FocA (P62605)                               | -                                |
| P fimbriae           | ECP4541 (PapA)                                                       | c3592 (PapA)                             | PapA (Q9L6D9)                               | -                                |
|                      | -                                                                    | c5188 (PapA)                             | PapA (Q9L6D9)                               | -                                |
| Pix                  | ECP2972 (PixA)                                                       | -                                        | PixA (CAE85161)                             | -                                |
| CS12-like            | ECP3811                                                              | -                                        | CswA (AAK09047)                             | -                                |
| CS1-like             | ECP3188                                                              | -                                        | CsuA1 (CAA66122)                            | -                                |
| F17-like             | ECP3784                                                              | -                                        | F17a-D (AAC45720)                           | -                                |
| Mat                  | ECP0356 (MatB)                                                       | c0404 (MatB)                             | MatB/YagZ (G6164)                           | YagZ (G6164)                     |
| Ygi                  | -                                                                    | c3792                                    | YgiL (P39834)                               | YgiL (P39834)                    |
| Yad                  | ECP151                                                               | c0172                                    | YadN (P37050)                               | YadN (P37050)                    |
| Yeh                  | ECP2149                                                              | c2638                                    | YehD (P33343)                               | YehD (P33343)                    |
| Yfc                  | ECP2377                                                              | c2884                                    | YfcV (P77288)                               | YfcV (P77288)                    |
| Yde                  | ECP1498<br>( <i>ydeS</i> fragment)                                   | c1933                                    | YdeS (P77789)                               | YdeS (P77789)                    |
| Other                |                                                                      |                                          |                                             |                                  |
| Curli                | ECP1035 (CsgA)                                                       | c1306 (CsgA)                             | CsgA (P28307)                               | CsgA (P28307)                    |

\*The corresponding designation of the putative major fimbrial subunits and their accession numbers are indicated in parentheses.
