# Supplementary material
Source: PubMed Central journal article supplement (PMC1568941)
Supplement: pnas_0603038103_3.pdf [file pnas_0603038103_3.pdf]

**Table 5. Determinants present in UPEC but absent in *E. coli* K-12 that may contribute to virulence/fitness**

| UPEC-specific DNA regions,<br>encoded functions                                                                                | No. of<br>ORFs | Size, bp | Position ( <i>E. coli</i><br>536 chromosome) |         | ORF designation ( <i>E. coli</i> 536) |          | ORF designation<br>( <i>E. coli</i> CFT073) |             |
|--------------------------------------------------------------------------------------------------------------------------------|----------------|----------|----------------------------------------------|---------|---------------------------------------|----------|---------------------------------------------|-------------|
|                                                                                                                                |                |          | Start                                        | End     | Start                                 | End      | Start                                       | End         |
| PAI VI ( <i>asnW</i> -associated polyketide biosynthesis determinant), putative iron transport system, cobalamine biosynthesis | 76             | 92719    | 2018257                                      | 2110976 | ECP01965                              | ECP02038 | c2449                                       | c2518       |
| PAI IV (yersiniabactin biosynthesis determinant), putative invasin, pseudogenes                                                | 42             | 56446    | 1953009                                      | 2009455 | ECP01913                              | ECP01955 | c2392                                       | c2440       |
| <i>metV</i> island, IHAP-like gene cluster                                                                                     | 29             | 40918    | 2945739                                      | 2986657 | ECP02804                              | ECP02832 | c3385                                       | c3409       |
| Fimbrial proteins                                                                                                              | 24             | 26111    | 306644                                       | 332755  | ECP00287                              | ECP00310 | c1233                                       | c1260       |
| Hemolysin-coregulated protein (Hpc), hypothetical proteins, sugar utilization                                                  | 23             | 23182    | 4199891                                      | 4223073 | ECP04024                              | ECP04046 | c4753                                       | c4779       |
| Several oxidoreductases, putative permease, putative TetR/AcrR-family transcriptional regulator                                | 11             | 11033    | 4655637                                      | 4666670 | ECP04448                              | ECP04459 | c5295                                       | c5304       |
| Fimbrial proteins                                                                                                              | 11             | 8800     | 4745324                                      | 4754124 | ECP04531                              | ECP04541 | <i>papX</i>                                 | <i>papA</i> |
| Fimbrial proteins                                                                                                              | 10             | 11757    | 3670723                                      | 3682480 | ECP03513                              | ECP03522 | c4204                                       | c4214       |
| Protein involved in the transport of hemolysin A                                                                               | 10             | 10077    | 4759984                                      | 4770061 | ECP04553                              | ECP04561 | <i>hlyD</i>                                 | c3565       |
| O-antigen synthesis/modification                                                                                               | 9              | 10696    | 2143893                                      | 2154589 | ECP02076                              | ECP02084 | <i>manB</i>                                 | c2566       |
| 2-oxoglutarate utilization system                                                                                              | 9              | 10893    | 4483619                                      | 4494512 | ECP04275                              | ECP04282 | c5032                                       | c5041       |

| UPEC-specific DNA regions,<br>encoded functions                                                                                                    | No. of<br>ORFs | Size, bp | Position ( <i>E. coli</i><br>536 chromosome) |         | ORF designation ( <i>E. coli</i> 536) |          | ORF designation<br>( <i>E. coli</i> CFT073) |             |
|----------------------------------------------------------------------------------------------------------------------------------------------------|----------------|----------|----------------------------------------------|---------|---------------------------------------|----------|---------------------------------------------|-------------|
|                                                                                                                                                    |                |          | Start                                        | End     | Start                                 | End      | Start                                       | End         |
| Putative membrane proteins, putative transcriptional regulator, putative pyridoxine phosphate biosynthetic protein, putative alcohol dehydrogenase | 8              | 8973     | 732243                                       | 741216  | ECP00692                              | ECP00699 | c0757                                       | c0765       |
| Putative galacticol/D-tagatose utilization                                                                                                         | 8              | 7876     | 3513256                                      | 3521132 | ECP03346                              | ECP03353 | c4013                                       | c4021       |
| PTS-dependent fructose utilization                                                                                                                 | 8              | 7140     | 3934771                                      | 3941911 | ECP03753                              | ECP03760 | c4481                                       | c4488       |
| PAI III autotransporter serine protease                                                                                                            | 7              | 7445     | 362627                                       | 370072  | ECP00343                              | ECP00349 | c0391                                       | c0398       |
| Dehydrogenases, putative allantoin degradation, C4-dicarboxylate transport system                                                                  | 7              | 9354     | 3267686                                      | 3277040 | ECP03103                              | ECP03109 | c3750                                       | <i>ygiK</i> |
| Sugar utilization                                                                                                                                  | 7              | 7724     | 4269990                                      | 4277714 | ECP04087                              | ECP04093 | <i>yihV</i>                                 | c4831       |
| Colicin cluster                                                                                                                                    | 6              | 3462     | 123276                                       | 126738  | ECP00113                              | ECP00118 | c0133                                       | c0137       |
| DNA integration/recombination/inversion protein (frame shift), part of the phage tail assembly protein                                             | 5              | 2010     | 620744                                       | 622754  | ECP00591                              | ECP00596 | c0646                                       | c0651       |
| Rtn protein (fragment), autotransporter fragmented                                                                                                 | 5              | 1443     | 1242901                                      | 1244344 | ECP01209                              | ECP01212 | c1610                                       | c1615       |
| EmrE protein                                                                                                                                       | 5              | 7570     | 1913321                                      | 1920891 | ECP01866                              | ECP01874 |                                             | <i>emrE</i> |
| Phosphoglycerate transport system transcriptional regulatory protein PgtA, regulatory proteins                                                     | 5              | 5278     | 3147160                                      | 3152438 | ECP02979                              | ECP02984 | <i>pgtA</i>                                 | c5199       |

| UPEC-specific DNA regions,<br>encoded functions                                                                                  | No. of<br>ORFs | Size, bp | Position ( <i>E. coli</i><br>536 chromosome) |         | ORF designation ( <i>E. coli</i> 536) |          | ORF designation<br>( <i>E. coli</i> CFT073) |       |
|----------------------------------------------------------------------------------------------------------------------------------|----------------|----------|----------------------------------------------|---------|---------------------------------------|----------|---------------------------------------------|-------|
|                                                                                                                                  |                |          | Start                                        | End     | Start                                 | End      | Start                                       | End   |
| DNA uptake/degradation                                                                                                           | 5              | 7184     | 4331768                                      | 4338952 | ECP04150                              | ECP04154 | c4894                                       | c4898 |
| Dipeptide uptake system                                                                                                          | 5              | 5067     | 4524502                                      | 4529569 | ECP04314                              | ECP04318 | <i>yddO</i>                                 | c5081 |
| Arginine degradation                                                                                                             | 5              | 5250     | 4709504                                      | 4714754 | ECP04496                              | ECP04500 | c5346                                       | c5350 |
| Putative autotransporter (fragment)                                                                                              | 4              | 1227     | 1246543                                      | 1245316 | ECP01215                              | ECP01218 | c1618                                       | c1620 |
| Putative membrane and cytosolic proteins                                                                                         | 4              | 5189     | 2206258                                      | 2211447 | ECP02124                              | ECP02127 | c2607                                       | c2610 |
| Putative sugar transport                                                                                                         | 4              | 2986     | 3152545                                      | 3155531 | ECP02985                              | ECP02990 | c0333                                       | c0330 |
| Polysialic acid capsule expression proteins                                                                                      | 4              | 3928     | 3182730                                      | 3186658 | ECP03024                              | ECP03027 | c3686                                       | c3689 |
| Putative lipase                                                                                                                  | 4              | 2311     | 4280810                                      | 4283121 | ECP04098                              | ECP04101 | c4836                                       | c4839 |
| C4-dicarboxylate transport system, putative<br>Na (+)/H (+) antiporter                                                           | 4              | 5113     | 4887891                                      | 4893004 | ECP04684                              | ECP04687 | c5431                                       | c5435 |
| Hypothetical beta-lactamase-related<br>protein, hypothetical flavodoxin                                                          | 4              | 3582     | 2860506                                      | 2864088 | ECP02721                              | ECP02724 | c3304                                       | c3302 |
| Putative transcriptional regulator, LysR<br>family (frame shift), putative regulator of<br>murein hydrolase (LrgB, LrgA family ) | 3              | 1627     | 4507169                                      | 4508796 | ECP04296                              | ECP04298 | c5058                                       | c5061 |
| Putative secreted sulfatase, putative<br>cytoplasmic protein                                                                     | 3              | 3659     | 16234                                        | 19893   | ECP00017                              | ECP00019 | c0021                                       | c0023 |
| TonB-dependent receptor, putative<br>cobalamin synthesis protein                                                                 | 3              | 4234     | 334467                                       | 338701  | ECP00314                              | ECP00316 | c1265                                       | c1267 |
| Hypothetical transcriptional regulator,<br>putative aldo/keto reductase family                                                   | 3              | 2791     | 384524                                       | 387315  | ECP00364                              | ECP00366 | c0412                                       | c0414 |

| UPEC-specific DNA regions,<br>encoded functions                                                              | No. of<br>ORFs | Size, bp | Position ( <i>E. coli</i><br>536 chromosome) |         | ORF designation ( <i>E. coli</i> 536) |          | ORF designation<br>( <i>E. coli</i> CFT073) |             |
|--------------------------------------------------------------------------------------------------------------|----------------|----------|----------------------------------------------|---------|---------------------------------------|----------|---------------------------------------------|-------------|
|                                                                                                              |                |          | Start                                        | End     | Start                                 | End      | Start                                       | End         |
| Proteins                                                                                                     |                |          |                                              |         |                                       |          |                                             |             |
| Nitrogen assimilation Regulatory protein<br>Nac, transcriptional regulator Cbl,<br>hypothetical protein YeeO | 3              | 2820     | 2015441                                      | 2018261 | ECP01962                              | ECP01964 | <i>nac</i>                                  | <i>yeeO</i> |
| Arylsulfate sulfotransferase, putative<br>disulfide isomerase,                                               | 3              | 1916     | 3301277                                      | 3303193 | ECP03134                              | ECP03136 | <i>asst</i>                                 | c3787       |
| Hypothetical proteins                                                                                        | 3              | 2611     | 4436030                                      | 4438641 | ECP04229                              | ECP04231 | c4977                                       | c4978       |
| Hypothetical protein                                                                                         | 2              | 1274     | 72461                                        | 73735   | ECP00066                              | ECP00067 | c0079                                       | c0080       |
| Hypothetical protein, putative peptide<br>chain release factor                                               | 2              | 1759     | 284663                                       | 286422  | ECP00264                              | ECP00265 | c0381                                       | <i>prfH</i> |
| Putative membrane protein                                                                                    | 2              | 1797     | 582926                                       | 584723  | ECP00553                              | ECP00554 | c0608                                       | <i>ybbJ</i> |
| Hypothetical protein                                                                                         | 2              | 976      | 2328950                                      | 2329926 | ECP02234                              | ECP02235 | c2728                                       | c2729       |
| LPS biosynthesis proteins                                                                                    | 2              | 2279     | 3903467                                      | 3905746 | ECP03722                              | ECP03723 | <i>waaV</i>                                 | <i>waaW</i> |
| Starvation sensing protein, transporter                                                                      | 2              | 2621     | 4365100                                      | 4367721 | ECP04174                              | ECP04175 | c4920                                       | <i>yjiZ</i> |
| Hypothetical protein, putative MP                                                                            | 2              | 1086     | 4478381                                      | 4479467 | ECP04272                              | ECP04273 | c5029                                       | c5030       |
| Hypothetical proteins, DNA binding helix-<br>turn helix protein                                              | 2              | 582      | 4925545                                      | 4926127 | ECP04775                              | ECP04776 | c5476                                       | c5477       |
| Putative autotransporter/adhesin                                                                             | 1              | 2294     | 404507                                       | 402213  | ECP00379                              | -        | c0426                                       | -           |
| Putative transcriptional regulator LysR<br>type                                                              | 1              | 185      | 695097                                       | 694912  | ECP00659                              | -        | c0719                                       | -           |
| Putative membrane protein                                                                                    | 1              | 1874     | 714130                                       | 716004  | ECP00679                              | -        | c0741                                       | -           |

| UPEC-specific DNA regions,<br>encoded functions                                    | No. of<br>ORFs | Size, bp | Position ( <i>E. coli</i><br>536 chromosome) |         | ORF designation ( <i>E. coli</i> 536) |     | ORF designation<br>( <i>E. coli</i> CFT073) |     |
|------------------------------------------------------------------------------------|----------------|----------|----------------------------------------------|---------|---------------------------------------|-----|---------------------------------------------|-----|
|                                                                                    |                |          | Start                                        | End     | Start                                 | End | Start                                       | End |
| Putative virulence protein GipA (Peyer's<br>patch-specific virulence factor GipA ) | 1              | 1127     | 822759                                       | 823886  | ECP00787                              | -   | <i>gipA</i>                                 | -   |
| Hemolysin E (fragment)                                                             | 1              | 278      | 1250668                                      | 1250946 | ECP01225                              | -   | c1630                                       | -   |
| Hypothetical protein                                                               | 1              | 275      | 1281829                                      | 1282104 | ECP01253                              | -   | c1660                                       | -   |
| Putative autotransporter/adhesin                                                   | 1              | 7373     | 1444970                                      | 1452343 | ECP01410                              | -   |                                             |     |
| Hypothetical protein                                                               | 1              | 1397     | 1534478                                      | 1533081 | ECP01489                              | -   | c1919                                       | -   |
| 6-Phospho-beta-glucosidase                                                         | 1              | 896      | 1568394                                      | 1567498 | ECP01519                              | -   | c1955                                       | -   |
| Hypothetical protein                                                               | 1              | 887      | 1571107                                      | 1570220 | ECP01521                              | -   | c1960                                       | -   |
| Ankyrin-like regulatory protein                                                    | 1              | 287      | 1721316                                      | 1721603 | ECP01671                              | -   | c2118                                       | -   |
| Putative TPR repeat protein                                                        | 1              | 1943     | 1764368                                      | 1762425 | ECP01711                              | -   | c2163                                       | -   |
| Chaperone protein HscC                                                             | 1              | 548      | 1766084                                      | 1765536 | ECP01713                              | -   | <i>ybeW</i>                                 | -   |
| Hypothetical protein                                                               | 1              | 578      | 1802382                                      | 1801804 | ECP01749                              | -   | c2206                                       | -   |
| Outer membrane porin                                                               | 1              | 1079     | 1913838                                      | 1914917 | ECP01867                              | -   | c2348                                       | -   |
| Outer membrane porin                                                               | 1              | 1055     | 1938975                                      | 1940030 | ECP01898                              | -   | c2383                                       | -   |
| Putative outer membrane protein (RatA<br>homolog)                                  | 1              | 212      | 2645565                                      | 2645353 | ECP02515                              | -   | c3029                                       | -   |
| Putative outer membrane protein (SinI<br>homolog)                                  | 1              | 1469     | 2647100                                      | 2645631 | ECP02516                              | -   | c3030                                       | -   |
| Putative intimin/ invasins (SinH homolog)                                          | 1              | 1175     | 2648396                                      | 2647221 | ECP02517                              | -   | c3031                                       | -   |
| Putative molybdenum-pterin-binding<br>protein                                      | 1              | 197      | 2837717                                      | 2837914 | ECP02700                              | -   | c3292                                       | -   |

| UPEC-specific DNA regions,<br>encoded functions | No. of<br>ORFs | Size, bp | Position ( <i>E. coli</i><br>536 chromosome) |         | ORF designation ( <i>E. coli</i> 536) |     | ORF designation<br>( <i>E. coli</i> CFT073) |     |
|-------------------------------------------------|----------------|----------|----------------------------------------------|---------|---------------------------------------|-----|---------------------------------------------|-----|
|                                                 |                |          | Start                                        | End     | Start                                 | End | Start                                       | End |
| Putative protease                               | 1              | 905      | 3095561                                      | 3096466 | ECP02928                              | -   | c3517                                       | -   |
| YggF (Fructose-1,6-bisphosphatase),<br>partial  | 1              | 977      | 3092035                                      | 3091850 | ECP02924                              | -   | c3513                                       | -   |
| Hypothetical protein                            | 1              | 422      | 3757738                                      | 3758160 | ECP03592                              | -   | c4303                                       | -   |
| Hypothetical protein                            | 1              | 461      | 3856488                                      | 3856949 | ECP03680                              | -   | c4398                                       | -   |
| Hypothetical protein                            | 1              | 1076     | 4476725                                      | 4477801 | ECP04270                              | -   | c5027                                       | -   |
| Hypothetical protein                            | 1              | 338      | 4860237                                      | 4860575 | ECP04662                              | -   | c5406                                       | -   |
| Putative membrane protein                       | 1              | 959      | 4038594                                      | 4039553 | ECP03876                              | -   | c4594                                       | -   |
