# Supplementary material
Source: PubMed Central journal article supplement (PMC1568941)
Supplement: pnas_0603038103_4.pdf [file pnas_0603038103_4.pdf]

**Table 6. Determinants present in UPEC strain 536 but absent in *E.coli* K-12 which may contribute to virulence/fitness**

| 536-specific DNA regions,<br>encoded functions                                                   | No. of<br>ORFs | Size, bp | Position<br>( <i>E. coli</i> 536 chromosome) |         | ORF designation ( <i>E. coli</i> 536) |          |
|--------------------------------------------------------------------------------------------------|----------------|----------|----------------------------------------------|---------|---------------------------------------|----------|
|                                                                                                  |                |          | Start                                        | End     | Start                                 | End      |
| <i>aspV</i> -associated IAHP gene cluster, Hcp protein, Vgr protein, H repeat-associated protein | 10             | 7904     | 263065                                       | 270969  | ECP0239                               | ECP0248  |
| PAI III, hypothetical proteins, ABC transporter, autotransporter                                 | 13             | 12049    | 294412                                       | 306461  | ECP00274                              | ECP00286 |
| Lysine decarboxylase                                                                             | 1              | 806      | 333225                                       | 334031  | ECP00312                              |          |
| Cadaverine transporter                                                                           | 26             | 23372    | 338889                                       | 362261  | ECP0317                               | ECP00342 |
| PAI V, hypothetical proteins, Pix fimbriae                                                       | 13             | 12178    | 3128357                                      | 3140535 | ECP02962                              | ECP02974 |
| Hypothetical protein                                                                             | 1              | 203      | 3147553                                      | 3147756 | ECP02980                              |          |
| Autotransporter, hypothetical Proteins, K15 capsule                                              | 35             | 28496    | 3155679                                      | 3184175 | ECP02991                              | ECP03024 |
| K15 capsule, general secretion pathway                                                           | 22             | 24662    | 3189181                                      | 3213842 | ECP03029                              | ECP03050 |
| PAI I, DNA methyltransferases, F17-like fimbriae, CS12-like fimbriae                             | 99             | 76370    | 3948173                                      | 4024543 | ECP03765                              | ECP03862 |
| PAI II hypothetical protein, DNA helicase                                                        | 10             | 9884     | 4735418                                      | 4745302 | ECP04521                              | ECP04530 |

| 536-specific DNA regions,<br>encoded functions                                                                               | No. of<br>ORFs | Size, bp | Position<br>( <i>E. coli</i> 536 chromosome) |         | ORF designation ( <i>E. coli</i> 536) |          |
|------------------------------------------------------------------------------------------------------------------------------|----------------|----------|----------------------------------------------|---------|---------------------------------------|----------|
|                                                                                                                              |                |          | Start                                        | End     | Start                                 | End      |
| P fimbriae                                                                                                                   | 11             | 5304     | 4754302                                      | 4759606 | ECP04542                              | ECP04552 |
| Contact-dependent inhibition of<br>growth proteins CdiAB,<br>propanediol/ethanol amine<br>utilization, hypothetical proteins | 80             | 71431    | 4770202                                      | 4841633 | ECP04562                              | ECP04641 |
| Prophage                                                                                                                     | 62             | 49423    | 1188849                                      | 1238272 | ECP01134                              | ECP01200 |
| Hypothetical proteins, IS elements                                                                                           | 14             | 15301    | 2839887                                      | 2855188 | ECP02702                              | ECP02714 |
| PTS, sucrose utilization                                                                                                     | 5              | 4620     | 2894490                                      | 2899110 | ECP02754                              | ECP02758 |
| Rhs/Vgr-family protein                                                                                                       | 4              | 3771     | 1499644                                      | 1503415 | ECP01457                              | ECP01460 |
| Putative fimbrial proteins                                                                                                   | 5              | 3686     | 3361931                                      | 3365617 | ECP03189                              | ECP03193 |
| Multidrug resistance proteins A and B                                                                                        | 2              | 2464     | 1425866                                      | 1428330 | ECP01394                              | ECP01395 |
| HipAB (persistence to inhibition of<br>murein or DNA biosynthesis, DNA-<br>binding regulator)                                | 2              | 1153     | 1551352                                      | 1552505 | ECP01501                              | ECP01502 |
| Hypothetical proteins                                                                                                        | 2              | 1297     | 573728                                       | 575025  | ECP00542                              | ECP00543 |
| Hypothetical proteins                                                                                                        | 2              | 2122     | 2680233                                      | 2682355 | ECP02546                              | ECP02547 |
| Hypothetical proteins                                                                                                        | 2              | 963      | 1351465                                      | 1352428 | ECP01320                              | ECP01321 |
| Putative TPR repeat protein                                                                                                  | 1              | 1040     | 1764376                                      | 1765416 | ECP01712                              |          |

| 536-specific DNA regions,<br>encoded functions                                 | No. of<br>ORFs | Size, bp | Position<br>( <i>E. coli</i> 536 chromosome) |         | ORF designation ( <i>E. coli</i> 536) |     |
|--------------------------------------------------------------------------------|----------------|----------|----------------------------------------------|---------|---------------------------------------|-----|
|                                                                                |                |          | Start                                        | End     | Start                                 | End |
| CDP-diacylglycerol-glycerol-3-phosphate<br>3-Phosphatidyltransferase (partial) | 1              | 203      | 1904529                                      | 1904732 | ECP01856                              |     |
| Part of putative outer membrane protein<br>YieC                                | 1              | 1184     | 1568589                                      | 1569773 | ECP01520                              |     |
| Formate hydrogenlyase subunit 6                                                | 1              | 539      | 2821785                                      | 2822324 | ECP02683                              |     |
| Hypothetical protein                                                           | 1              | 299      | 576659                                       | 576958  | ECP00546                              |     |
| Hypothetical protein                                                           | 1              | 902      | 1311880                                      | 1312782 | ECP01281                              |     |
