# Supplementary material
Source: PubMed Central journal article supplement (PMC1568941)

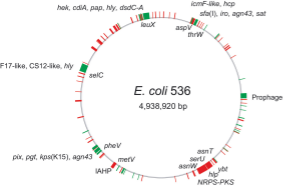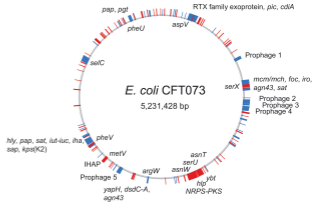

- █ *E. coli* 536-specific
- █ *E. coli* CFT073-specific
- █ UPEC-specific

Supplement: pnas_0603038103_1.pdf [file pnas_0603038103_1.pdf]
